# Supplementary material for: Inhaled ciprofloxacin-loaded poly(2-ethyl-2-oxazoline) nanoparticles from dry powder inhaler formulation for the potential treatment of lower respiratory tract infections
Source: PubMed Central journal article supplement (PMC8699692; doi:10.1371/journal.pone.0261720), 2021-12-23
Supplement: pone.0261720.s001.pdf [file pone.0261720.s001.pdf]

## Supporting Information

The crystal structure of ciprofloxacin used in this study from Rietveld refinement:

```
data_
_chemical_name_mineral 1-Cyclopropyl-6-fluoro-4-oxo-7-(piperazin-4-ium-1-yl)-1,4-dihydroquinoline-3-
carboxylate
_cell_length_a 7.96045562
_cell_length_b 8.57791746
_cell_length_c 10.7735382
_cell_angle_alpha 87.8568055
_cell_angle_beta 85.1422169
_cell_angle_gamma 88.2246609
_cell_volume 732.220576
_symmetry_space_group_name_H-M P-1
loop_
_symmetry_equiv_pos_as_xyz
'x, y, z '
'-x, -y, -z '
loop_
_atom_site_label
_atom_site_type_symbol
_atom_site_site_symmetry_multiplicity
_atom_site_fract_x
_atom_site_fract_y
_atom_site_fract_z
_atom_site_occupancy
_atom_site_B_iso_or_equiv
F_1 F 2 1.1755(8) 0.0347(13) -0.2586(11) 1 1.32647
O_1 O 2 1.322(5) 0.432(5) 0.414(3) 1 1.32647
O_2 O 2 1.437(4) 0.197(5) 0.389(4) 1 1.32647
O_3 O 2 1.449(2) 0.149(3) 0.1245(18) 1 1.32647
N_1 N 2 0.959(2) 0.3177(18) 0.1797(8) 1 1.32647
N_2 N 2 0.8439(7) 0.1566(7) -0.2351(5) 1 1.32647
N_3 N 2 0.6215(5) 0.2382(4) -0.4289(3) 1 1.32647
C_1 C 2 0.781(3) 0.351(3) 0.2156(6) 1 1.32647
C_2 C 2 0.728(4) 0.500(3) 0.2779(19) 1 1.32647
C_3 C 2 0.711(3) 0.482(3) 0.1402(9) 1 1.32647
C_4 C 2 1.0101(19) 0.2487(16) 0.0693(8) 1 1.32647
C_5 C 2 1.067(3) 0.328(2) 0.2683(10) 1 1.32647
C_6 C 2 1.231(3) 0.273(3) 0.2560(14) 1 1.32647
C_7 C 2 1.328(3) 0.301(3) 0.3652(16) 1 1.32647
C_8 C 2 1.298(2) 0.200(2) 0.1436(15) 1 1.32647
C_9 C 2 1.1808(18) 0.1881(19) 0.0487(12) 1 1.32647
C_10 C 2 1.2331(13) 0.1176(18) -0.0644(13) 1 1.32647
C_11 C 2 1.1220(10) 0.1080(14) -0.1531(10) 1 1.32647
C_12 C 2 0.9508(10) 0.1662(11) -0.1382(6) 1 1.32647
C_13 C 2 0.6732(8) 0.2206(8) -0.2031(9) 1 1.32647
C_14 C 2 0.5543(8) 0.1867(5) -0.3011(8) 1 1.32647
C_15 C 2 0.7961(11) 0.1751(6) -0.4594(11) 1 1.32647
C_16 C 2 0.9092(8) 0.2207(7) -0.3603(13) 1 1.32647
C_17 C 2 0.8988(15) 0.2358(12) -0.0249(6) 1 1.32647
H_1 H 2 0.701(3) 0.266(3) 0.2395(13) 1 1.58703
H_2 H 2 0.817(4) 0.567(3) 0.303(3) 1 1.58703
H_3 H 2 0.624(4) 0.499(3) 0.335(2) 1 1.58703
H_4 H 2 0.791(4) 0.536(3) 0.0784(12) 1 1.58703
H_5 H 2 0.595(4) 0.470(3) 0.1134(16) 1 1.58703
H_6 H 2 1.028(3) 0.376(2) 0.3433(10) 1 1.58703
H_7 H 2 1.3457(13) 0.077(2) -0.0789(15) 1 1.58703
H_8 H 2 0.6293(9) 0.1757(10) -0.1211(9) 1 1.58703
H_9 H 2 0.6784(8) 0.3340(8) -0.1955(8) 1 1.58703
H_10 H 2 0.5341(10) 0.0733(6) -0.2999(9) 1 1.58703
H_11 H 2 0.4456(8) 0.2416(7) -0.2805(6) 1 1.58703
H_12 H 2 0.8405(13) 0.2167(7) -0.5418(11) 1 1.58703
H_13 H 2 0.7952(13) 0.0597(6) -0.4634(13) 1 1.58703
H_14 H 2 1.0256(9) 0.1807(9) -0.3820(15) 1 1.58703
```

|      |   |   |            |            |             |   |         |
|------|---|---|------------|------------|-------------|---|---------|
| H_15 | H | 2 | 0.9129(8)  | 0.3360(8)  | -0.3588(11) | 1 | 1.58703 |
| H_16 | H | 2 | 0.7857(16) | 0.2751(11) | -0.0111(4)  | 1 | 1.58703 |
| H_17 | H | 2 | 0.6233(9)  | 0.3378(5)  | -0.4344(7)  | 1 | 1.58703 |
| H_18 | H | 2 | 0.5630(12) | 0.2087(7)  | -0.4881(7)  | 1 | 1.58703 |

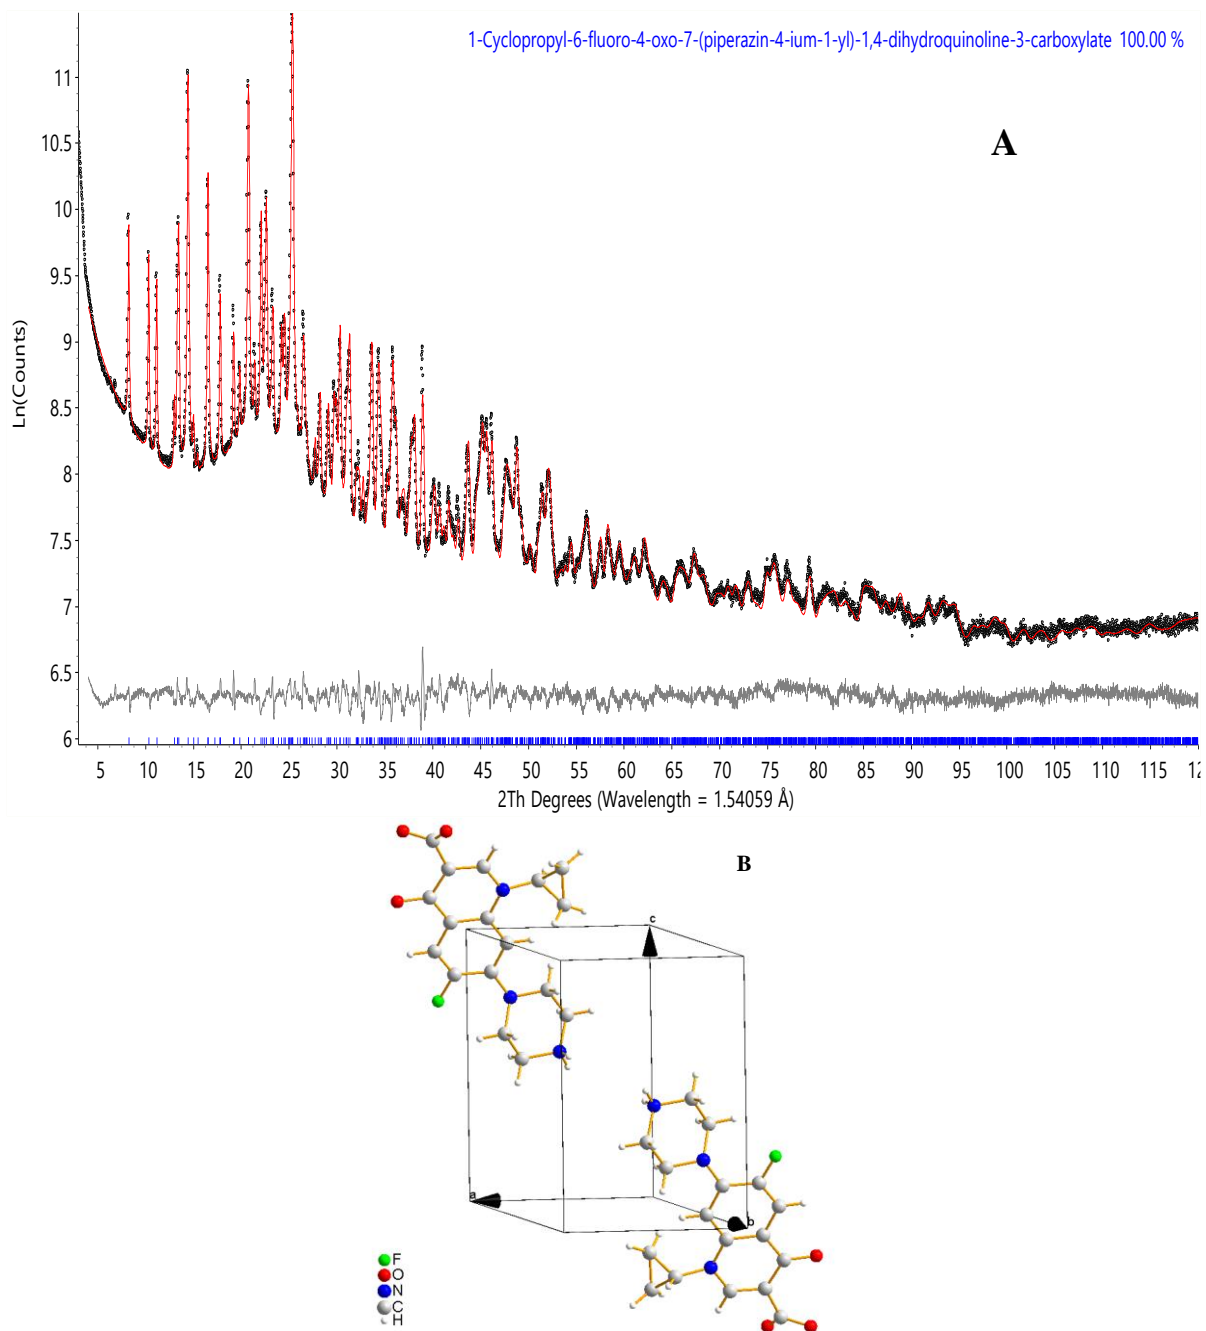

**Fig S1.** The fitting of XRPD pattern for Qualitative phase analysis of (A) the Rietveld refinement using rigid body model of CIP to the measured PXRD patterns of the API phase, Rwp = 5.71%, GOF = 3.04; (B) the refined crystal structure of the API phase CIP used in this study. All the XRD patterns in this paper are shown on a logarithmic scale to emphasize minor peaks.

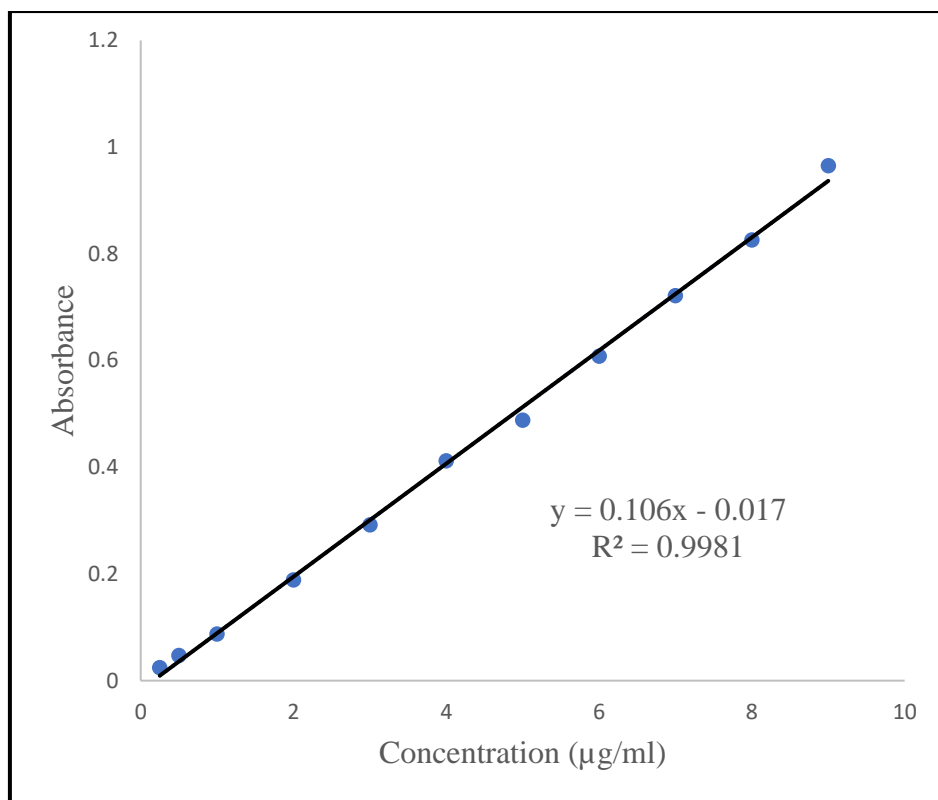

**Fig S2.** Calibration plot of CIP in PBS (pH 7.4) solution at the concentration range of 1 µg/ml to 9 µg/ml

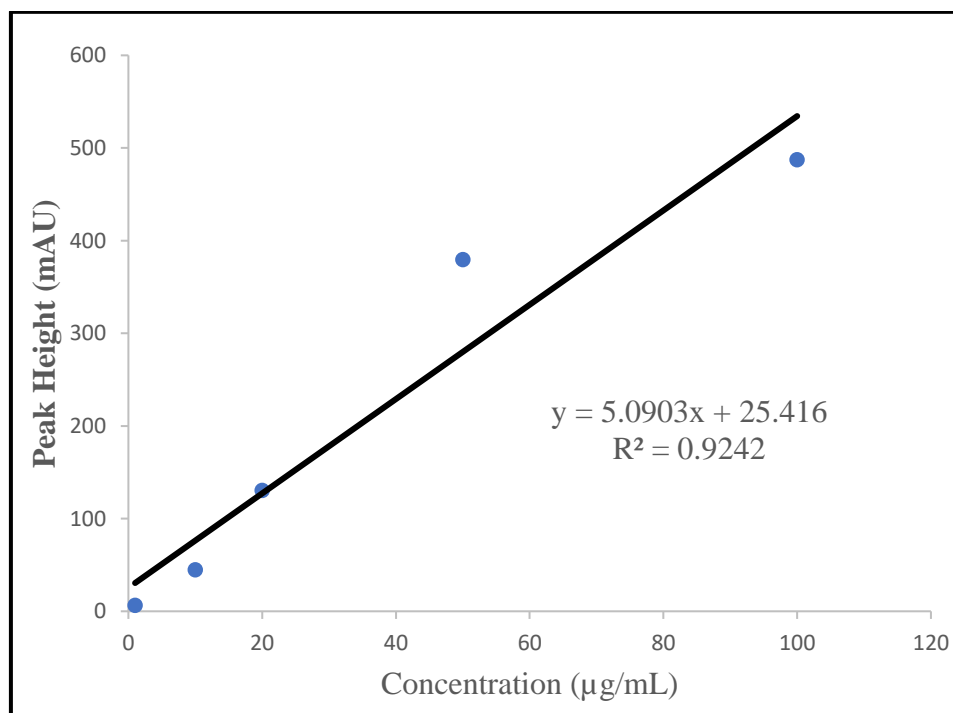

**Fig S3.** Calibration plot of CIP in PBS (pH 7.4) solution at the concentration range of 1 µg/ml to 100 µg/ml

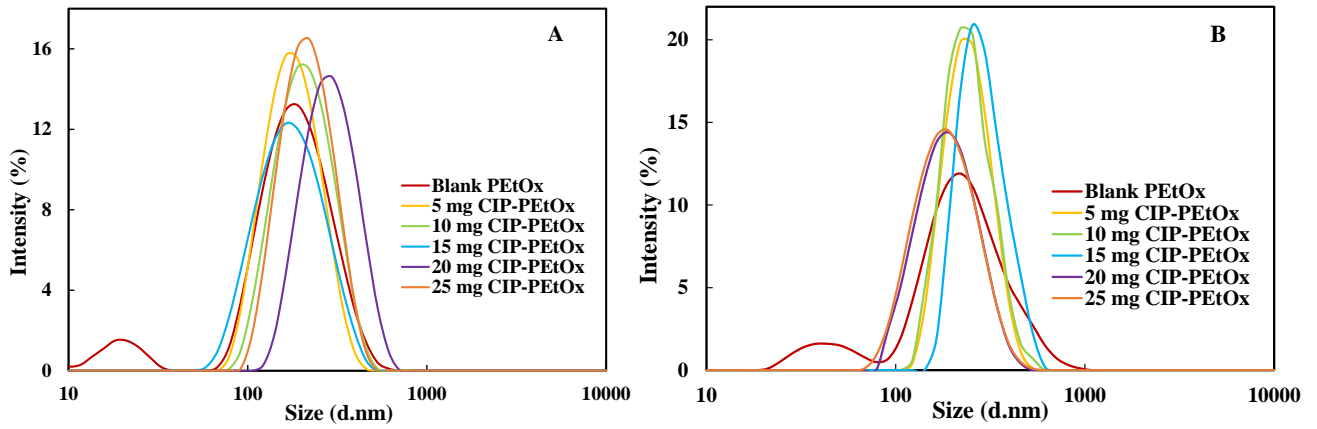

**Fig S4.** DLS particle size distribution of blank PETox NPs and different amounts of CIP-loaded PETox NPs from 5-25 mg (A) before freeze-drying; (B) after freeze-drying (n = 3)

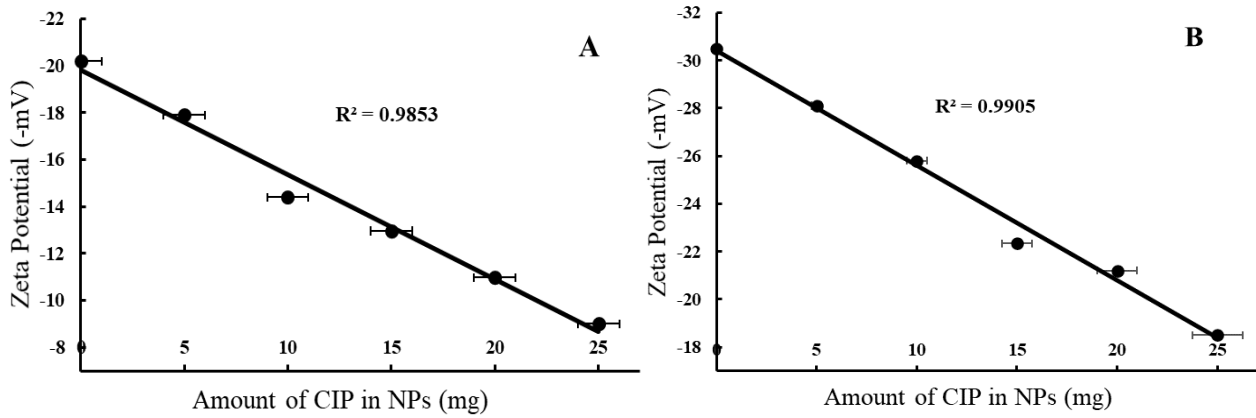

**Fig S5.** Surface charge relationship between blank PETox NPs and different amounts of CIP-loaded PETox NPs (A) before freeze-drying; (B) after freeze-drying (n = 3)
